# Supplementary material for: Equal volume impregnation–air calcination synthesis of lithium-doped MgO nanoplates for enhanced antibacterial performance
Source: Royal Society of Chemistry journal article supplement (doi:10.1039/d4ra07138g), 2025-01-01
Supplement: d4ra07138g1.pdf [file d4ra07138g1.pdf]

## Electronic Supplementary Information (ESI)

### Equal volume impregnation-air calcination synthesis of lithium-doped MgO nanoplates for enhanced antibacterial performance

Xiaoyi Li<sup>a</sup>, Junmei Pu<sup>a</sup>, Yanqun Zu<sup>a</sup>, Yongmei He<sup>a</sup>, Fangdong Zhan<sup>a</sup>, Xi Li<sup>a</sup> and Jiao  
Zhao<sup>\*b</sup>

a. College of Resources and Environmental Science, Yunnan Agricultural University,  
Kunming 650201, China.

b. Collaborative Innovation Center for Vessel Pollution Monitoring and Control,  
Dalian Maritime University, Dalian 116026, China.

Corresponding E-mail: zhaojiao@dlmu.edu.cn

**Table S1** XRD, XPS data and antibacterial ratio of Li-doped nano-MgO.

| Samples   | 2 $\theta$<br>( $^{\circ}$ ) | FWHM<br>( $^{\circ}$ ) | <i>d</i> -Spacing<br>( $\text{\AA}$ ) | Crystal<br>size (nm) <sup>a</sup> | XPS-O <sub>A</sub><br>(%) | Antibacterial<br>ratio (%) |
|-----------|------------------------------|------------------------|---------------------------------------|-----------------------------------|---------------------------|----------------------------|
| MgO       | 42.8                         | 0.171                  | 2.1067                                | 49.3                              | 50.8                      | 84.4                       |
| 0.1Li-MgO | 42.9                         | 0.174                  | 2.1057                                | 48.5                              | 52.7                      | 86.5                       |
| 0.5Li-MgO | 42.9                         | 0.188                  | 2.1049                                | 44.9                              | 57.6                      | 91.8                       |
| 1.5Li-MgO | 42.9                         | 0.212                  | 2.1047                                | 39.8                              | 61.9                      | 99.6                       |

<sup>a</sup> The crystallite size of MgO samples was calculated using the Debye-Scherrer formula based on the (200) plane from XRD data.

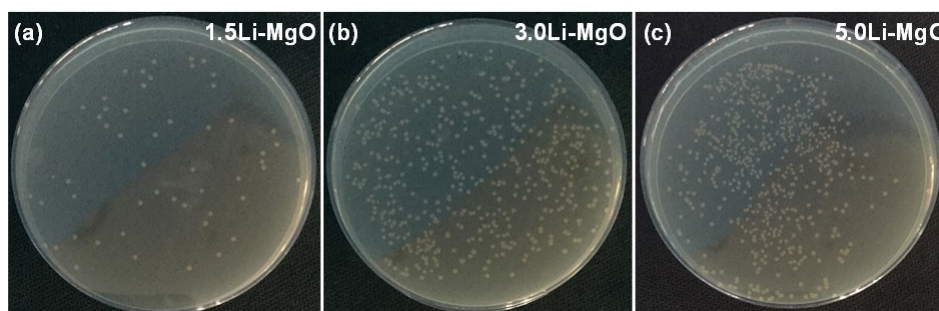

**Fig. S1** Representative photographs for the antibacterial activities of 1.5Li-MgO, 3.0Li-MgO and 5.0Li-MgO.
